# Supplementary material for: The Global Contribution of Outdoor Air Pollution to the Incidence, Prevalence, Mortality and Hospital Admission for Chronic Obstructive Pulmonary Disease: A Systematic Review and Meta-Analysis
Source: MDPI journal article supplement (doi:10.3390/ijerph111111822), 2014-11-14
Supplement: s1 [file s1]

# The Global Contribution of Outdoor Air Pollution to the Incidence, Prevalence, Mortality and Hospital Admission for Chronic Obstructive Pulmonary Disease: A Systematic Review and Meta-Analysis

**Table S1.** The study characteristics for included articles.

| Publication Year | Study Design                    | Research Field                  | Settings                                                                                        | Exposure          | Outcome                                                       | Effect size                                   | adjusted factors                                                                                                                                                                    |
|------------------|---------------------------------|---------------------------------|-------------------------------------------------------------------------------------------------|-------------------|---------------------------------------------------------------|-----------------------------------------------|-------------------------------------------------------------------------------------------------------------------------------------------------------------------------------------|
| 1991 [1]         | Cohort                          | California                      | no smoking<br>California<br>Seventh-Day<br>Adventists were<br>monitored for a<br>6-year period, | TSP               | New cases of<br>definite symptoms<br>of chronic<br>bronchitis | Significant<br>association was<br>observed    | Age, education, sex,<br>childhood colds, childhood air<br>obstructive disease, possible<br>symptoms, years smoked,<br>years lived with a smoker, and<br>years worked with a smoker. |
| 2003 [2]         | Nested<br>case-control<br>study | Athens                          | 84 cases and 168<br>healthy controls                                                            | Black<br>Smoke    | Incidence of<br>COPD                                          | Significant<br>association was<br>observed    | Age, gender, smoking habits<br>and education                                                                                                                                        |
| 2006 [3]         | Cohort                          | 21 cities in 10<br>EU countries | Randomized<br>subjects from<br>21 cities                                                        | PM <sub>2.5</sub> | prevalence chronic<br>bronchitis                              | No significant<br>association was<br>observed | Age, Smoking status,<br>respiratory infections, rhinitis,<br>social class and traffic                                                                                               |
| 1993 [4]         | cross-sectional<br>study        | 53 USurban<br>areas             | Representative<br>sample of US<br>population                                                    | TSP               | Prevalence of<br>Chronic Bronchitis                           | Significant<br>association was<br>observed    | Age, race, sex and smoking                                                                                                                                                          |
| 1993 [5]         | cross-sectional<br>study        | Beijing                         | 1576 subjects<br>with smoking<br>status in age of<br>40–69                                      | TSP               | Prevalence of<br>chronic bronchitis                           | Significant<br>association was<br>observed    | Income, indoor crowding,<br>occupational exposure,<br>cooking gases or fumes,<br>indoor coal combustion and<br>passive smoking                                                      |

Table S1. Cont.

| Publication Year | Study Design         | Research Field        | settings                                                                            | Exposure                               | Outcome    | Effect size                                                            | adjusted factors                                                                                                                                            |
|------------------|----------------------|-----------------------|-------------------------------------------------------------------------------------|----------------------------------------|------------|------------------------------------------------------------------------|-------------------------------------------------------------------------------------------------------------------------------------------------------------|
| 2008 [6]         | Cohort               | 34 cities in US       | COPD cases                                                                          | PM <sub>10</sub>                       | COPD death | Significant association was observed for PM <sub>10</sub>              | Age, gender, race, Season of admission, number of days of coronary and medical intensive care, previous diagnoses for some diseases, time period and season |
| 2007 [7]         | Cohort               | Oslo, Norway          | All inhabitants of Oslo, Norway, aged 51–90 years on 1992                           | PM <sub>10</sub> and PM <sub>2.5</sub> | COPD death | Both increased COPD mortality in both genders                          | occupational class and length of education                                                                                                                  |
| 2004 [8]         | case-crossover study | Cook County, Illinois | Elderly residents with a history of hospitalization for heart or lung disease       | PM <sub>10</sub>                       | COPD death | No significant association was observed                                | Mean temperature, humidity, and barometric pressure                                                                                                         |
| 2001 [9]         | case-crossover study | Barcelona             | Residents > 35 years, attended emergency room for COPD 1985–1989 and died 1990–1995 | PM <sub>10</sub>                       | COPD death | PM <sub>10</sub> increase associated with the higher mortality of COPD | Temperature, humidity, hot days and influenza days                                                                                                          |
| 2003 [10]        | case-crossover study | Shanghai              | Data of cause-specific mortality and air pollution 2000–2001                        | PM <sub>10</sub>                       | COPD death | No significant association was observed                                | Mean temperature and humidity                                                                                                                               |

Table S1. Cont.

| Publication Year | Study Design          | Research Field | Settings                                                           | Exposure                               | Outcome    | Effect Size                                                           | Adjusted Factors                                                                                                                     |
|------------------|-----------------------|----------------|--------------------------------------------------------------------|----------------------------------------|------------|-----------------------------------------------------------------------|--------------------------------------------------------------------------------------------------------------------------------------|
| 2001 [11]        | Time-series study     | 10 US cities   | Subjects from 10 cities of US                                      | PM <sub>10</sub>                       | COPD death | Significant association was observed                                  | Weather and season                                                                                                                   |
| 1992 [12]        | Time-series study     | Philadelphia   | Daily death from 1973–1980                                         | TSP                                    | COPD death | Significant association was observed                                  | Year, season, temperature, humidity                                                                                                  |
| 2000 [13]        | Time-series study     | Mexico         | Mortality data of Mexico city population                           | PM <sub>10</sub>                       | COPD death | Increased mortality associated with PM                                | time, month, temperature, relative humidity, day of the week and holidays                                                            |
| 2003 [14]        | Time-series study     | Netherland     | Mortality counts from 1986–1994                                    | PM <sub>10</sub> and Black Smoke       | COPD death | In some age-specific groups, the significant association was observed | Long-term trends, seasonal trends, influenza epidemics, ambient temperature, ambient relative humidity, day of the week and holidays |
| 1997 [15]        | Time-series study     | Birmingham     | Mortality data of Birmingham population 1992–1994                  | PM <sub>10</sub>                       | COPD death | The significant association existed in some lag day                   | Temperature and relative humidity                                                                                                    |
| 2005 [16]        | cross-sectional study | Japan          | The annual statistics and air pollution estimates throughout Japan | PM <sub>10</sub> and PM <sub>2.5</sub> | COPD death | In females, a significant association was observed                    | Age and smoking rate                                                                                                                 |

Table S1. Cont.

| Publication Year | Study Design      | Research Field        | Settings                                                                                | Exposure          | Outcome                      | Effect Size                             | Adjusted Factors                                                                                                  |
|------------------|-------------------|-----------------------|-----------------------------------------------------------------------------------------|-------------------|------------------------------|-----------------------------------------|-------------------------------------------------------------------------------------------------------------------|
| 2002 [17]        | Time-series study | Hong Kong             | Daily mortalities for respiratory and cardiovascular diseases 1995–1998                 | PM <sub>10</sub>  | COPD death                   | Significant association was observed    | Day of the time series, days of the week, seasonal variations, temperature and humidity                           |
| 2009 [18]        | Time-series study | Hong Kong             | Daily counts of hospitalization and mortalities from the 14 general hospitals 1996–2002 | PM <sub>10</sub>  | COPD death                   | No significant association was observed | Daily mean temperature, relative humidity and influenza                                                           |
| 2000 [19]        | Time-series study | Shenyang, China       | Air pollution in 1992 and daily mortality data of 1992                                  | TSP               | COPD death                   | No significant association was observed | Temperature, humidity, and Sunday                                                                                 |
| 2002 [20]        | Time-series study | 14 cities in US       | Persons ≥ 65 years from 14 cities and daily PM <sub>10</sub> measurements 1985–1994     | PM <sub>10</sub>  | Hospital admission of COPD   | No significant association was observed | Season, weather variables (24-h means of temperature, relative humidity, and barometric pressure) and day of week |
| 2006 [21]        | Time-series study | 204 US urban counties | National database comprising daily time-series data 1999–2002                           | PM <sub>2.5</sub> | Hospital admissions for COPD | Significant association was observed    | Temperature and dew-point temperature                                                                             |

Table S1. Cont.

| Publication Year | Study Design      | Research Field         | Settings                                          | Exposure                                         | Outcome                      | Effect Size                                              | Adjusted Factors                                                                                                                           |
|------------------|-------------------|------------------------|---------------------------------------------------|--------------------------------------------------|------------------------------|----------------------------------------------------------|--------------------------------------------------------------------------------------------------------------------------------------------|
| 2000 [22]        | Time-series study | 3 counties in US       | Daily hospital admissions 1987–1995               | PM <sub>10</sub> and PM <sub>2.5</sub>           | Hospital admission of COPD   | Significant association was observed                     | Temporal trends, temperature, relative humidity, and day of week                                                                           |
| 2000 [23]        | Time-series study | Nevada                 | Daily hospital admissions 1990–1994.              | PM <sub>10</sub>                                 | Hospital admission of COPD   | Significant association was observed                     | Weather variables, day of week, seasons, and time trend                                                                                    |
| 1994 [24]        | Time-series study | Birmingham, Alabama    | Records for pneumonia and COPD, 1986–1989         | PM <sub>10</sub>                                 | Hospital admissions for COPD | Significant association existed                          | Time trends, seasonal fluctuations, and weather                                                                                            |
| 1994 [25]        | Time-series study | Minneapolis, Minnesota | Medicare records for the years 1986 through 1989. | PM <sub>10</sub>                                 | Hospital admissions for COPD | In lag 0–1 day, the significant association was observed | Temperature, dew point temperature and time terms                                                                                          |
| 2005 [26]        | Time-series study | Atlanta                | Hospital admission of COPD 1993–2000              | PM <sub>10</sub> , coarse PM & PM <sub>2.5</sub> | Hospital admissions for COPD | Non-significant association existed in lag 0–2 day       | Day-of-week, hospital entry/exit, and holidays, time with monthly knots, season indicator variables, temperature and dew point temperature |
| 1994 [27]        | Time-series study | Detroit, Michigan      | Hospital admission of COPD 1986–1989              | PM <sub>10</sub>                                 | Hospital admission of COPD   | Significant association existed                          | Seasonal, temporal trends, temperature and dew point temperature                                                                           |
| 2000 [28]        | Time-series study | Michigan               | Hospital admission of COPD 1982–1994              | PM <sub>10</sub>                                 | Hospital admission of COPD   | Significant association was observed in the lag 3 day    | Temperature, humidity, seasonal cycles and influenza epidemics                                                                             |

Table S1. Cont.

| Publication Year | Study Design       | Research Field                      | Settings                                                                           | Exposure                         | Outcome                      | Effect Size                               | Adjusted Factors                                                                                                                 |
|------------------|--------------------|-------------------------------------|------------------------------------------------------------------------------------|----------------------------------|------------------------------|-------------------------------------------|----------------------------------------------------------------------------------------------------------------------------------|
| 2005 [29]        | Time-series study  | Vancouver, British Columbia, Canada | Daily counts of acute COPD hospitalization 1994–1998                               | PM <sub>10</sub>                 | Hospital admissions for COPD | Significant association was observed      | Weather conditions                                                                                                               |
| 1997 [15]        | Time-series study. | Birmingham, United Kingdom          | Air pollution data were taken from a national network monitoring station 1992–1994 | PM <sub>10</sub>                 | Hospital admissions for COPD | Non-significant association existed       | Day of the week and month, Maximum daily temperature and mean daily relative humidity                                            |
| 1993 [30]        | Time-series study  | Barcelona                           | Daily emergency room admissions for residents $\geq$ 14 years with COPD, 1985–1989 | Black smoke                      | Hospital admissions for COPD | Significant association existed in winter | Temperature, day of the week, and year                                                                                           |
| 1996 [31]        | Time-series study  | Paris                               | Hospital admission for COPD, 1987–1992                                             | Black smoke and PM <sub>13</sub> | Hospital admission for COPD  | Non-significant association was observed  | Linear trend, , day of the week, influenza A epidemic, holidays, temperature, humidity                                           |
| 2001 [32]        | Time-series study  | Rome                                | Emergency hospital admissions for respiratory conditions, 1995–1997                | TSP                              | hospital admissions for COPD | Non-significant association was observed  | The day of study, mean temperature, mean humidity, influenza epidemics, and indicator variables for day of the week and holidays |

Table S1. Cont.

| Publication Year | Study Design       | Research Field                 | Settings                                                        | Exposure                               | Outcome                                             | Effect Size                                          | Adjusted Factors                                                                                                                      |
|------------------|--------------------|--------------------------------|-----------------------------------------------------------------|----------------------------------------|-----------------------------------------------------|------------------------------------------------------|---------------------------------------------------------------------------------------------------------------------------------------|
| 2009 [33]        | Time-series study  | Drobeta-Turnu Severin, Romania | Hospital admissions of chronic bronchitis and COPD in 586 days  | TSP                                    | Hospital admissions for COPD and chronic bronchitis | Significant association was observed                 | Day of the week and holiday and nonlinear effects of time, of temperature, of infectious diseases and humidity                        |
| 2009 [34]        | Time-series study  | Nis, Serbia                    | Daily counts of emergency room visits and air pollution in 2002 | Black smoke                            | Emergency room visit for COPD                       | In lag 0–2 day, significant association was observed | Time trend, seasonal variation, days of week, temperature, relative humidity air pressure, precipitation, rainfall, snowfall and wind |
| 1999 [35]        | Time-series study  | Hong Kong                      | Hospital admission of COPD in Hong Kong 1994–1995               | PM <sub>10</sub>                       | Hospital admissions for COPD                        | In lag 0–3 day, significant association was observed | Trend, season, and other cyclical factors, temperature, and humidity                                                                  |
| 2007 [36]        | Time-series study. | Hong Kong                      | Hospital admission for COPD and air condition in HK 2000–2004   | PM <sub>10</sub> and PM <sub>2.5</sub> | Hospital admission for COPD                         | Significant association could be got in some lag day | Time trend, season, other cyclical factors, temperature and humidity                                                                  |
| 2009 [18]        | Time-series study  | Hong Kong                      | Hospitalization from the 14 general hospitals, 1996–2002        | PM <sub>10</sub>                       | Hospital admission for COPD                         | Significant association was observed in lag 0–1 day  | Daily mean temperature, relative humidity and influenza                                                                               |

Table S1. Cont.

| Publication Year | Study Design         | Research Field | Settings                                                     | Exposure         | Outcome                        | Effect Size                                            | Adjusted Factors                                                            |
|------------------|----------------------|----------------|--------------------------------------------------------------|------------------|--------------------------------|--------------------------------------------------------|-----------------------------------------------------------------------------|
| 1998 [37]        | Time-series study    | Sydney         | Hospital admission of COPD 1990–1994                         | PM <sub>10</sub> | Hospital admissions for COPD   | There was a non-significant association in lag 0 day   | Weather, seasonal trends and temperature                                    |
| 2002 [38]        | Time-series study    | Delhi          | Daily emergency room visits and air pollution data 1997–1998 | TSP              | Emergency room visits for COPD | Non-significant association existed                    | Season, day of the week, temperature and humidity                           |
| 2011 [39]        | Time-series study    | Cartagena      | Daily emergency room visits and air pollution data 1995–1998 | TSP              | Emergency room visits for COPD | Significant associations were observed in lag 0 day    | Season, weather indicators, influenza, day of the week, and public holidays |
| 2009 [40]        | Time-series study    | Sa˜o Paulo     | COPD emergency room visits and air pollution data 2001–2003  | PM <sub>10</sub> | Emergency room visits for COPD | Significant associations were observed in lag 0–2 days | Season, temperature and humidity                                            |
| 2009 [41]        | case crossover study | England        | Daily COPD admissions were recorded, 2006–2007               | PM <sub>10</sub> | Daily COPD admissions          | Non-significant association existed in the mean 8 days | Maximum temperature, pollen, and influenza infection.                       |



Table S1. Cont.

| Publication Year | Study Design         | Research Field    | Settings                                                                            | Exposure         | Outcome                      | Effect Size                                                   | Adjusted Factors            |
|------------------|----------------------|-------------------|-------------------------------------------------------------------------------------|------------------|------------------------------|---------------------------------------------------------------|-----------------------------|
| 2007 [42]        | case crossover study | Taipei, Taiwan    | Hospital admissions for COPD and ambient air pollution data for Taipei 1996–2003    | PM <sub>10</sub> | Hospital admissions for COPD | In higher temperature, a significant association was observed | Temperature and humidity.   |
| 2007 [43]        | case crossover study | Kaohsiung, Taiwan | Hospital admissions for COPD and ambient air pollution data for Kaohsiung 1996–2003 | PM <sub>10</sub> | Hospital admissions for COPD | Significant association existed                               | Temperature and humidity.   |
| 2006 [44]        | case crossover study | 36 US cities      | Respiratory hospital admissions and air pollution data 1986–1999                    | PM <sub>10</sub> | Hospital admission for COPD  | In warm season, there was a significant association           | Day of the week and weather |

**Figure S1.** Flow diagram for study search, inclusions and exclusions.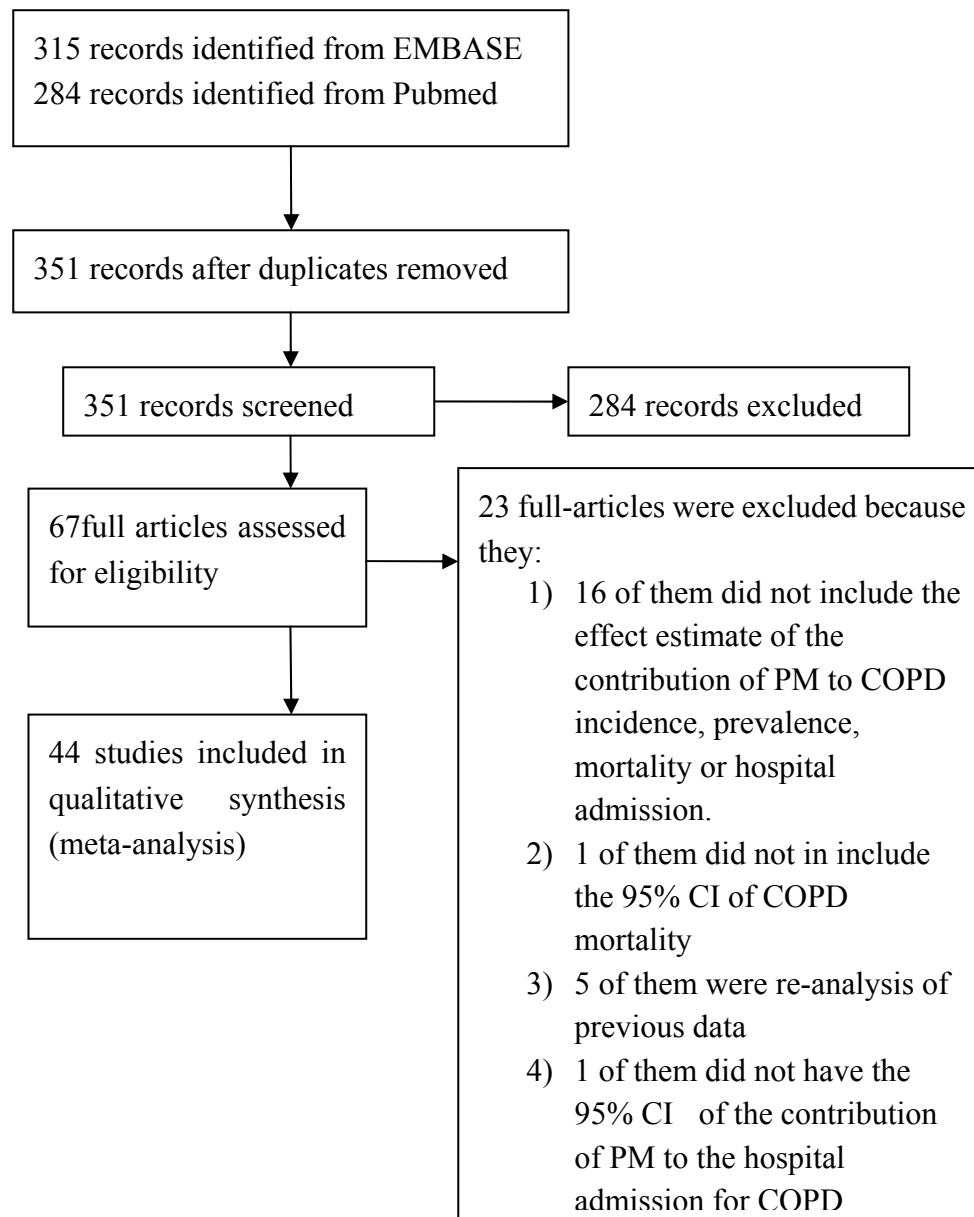

**Figure S2.** Funnel plot for the studies on COPD mortality.

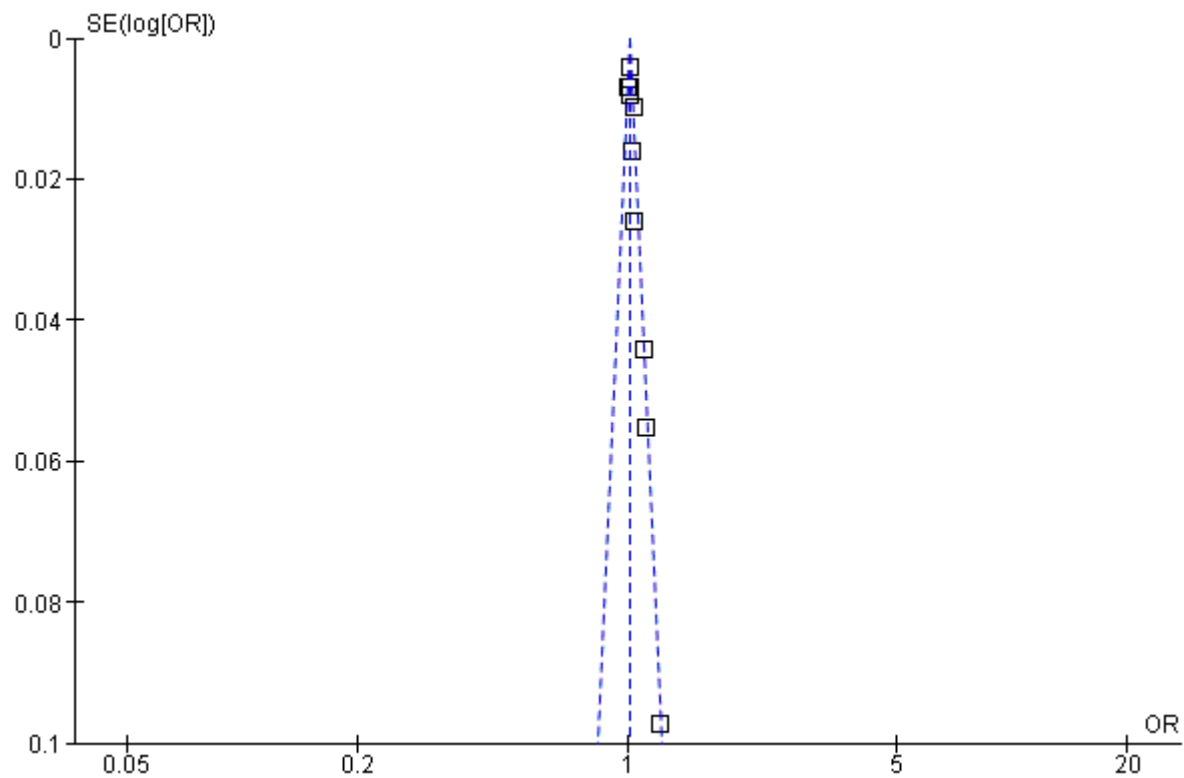

**Figure S3.** Funnel plot for the studies about hospital admission for COPD.

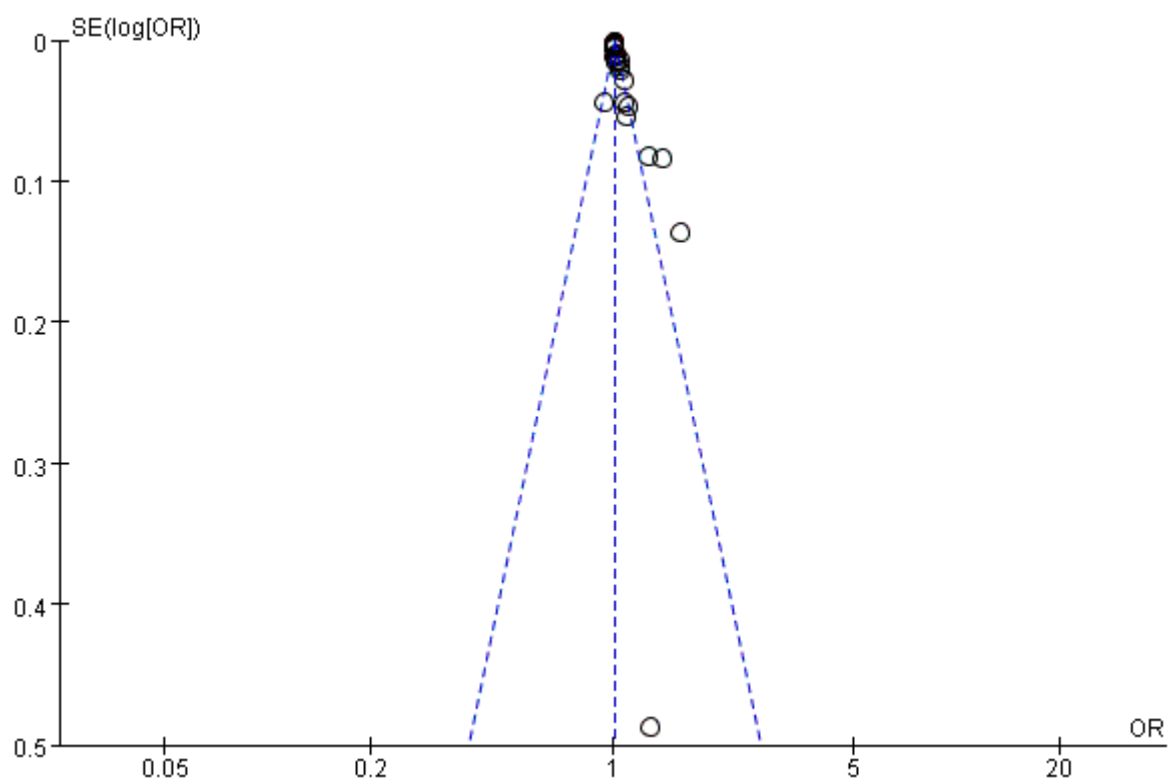

## References

1. Abbey, D.E.; Mills, P.K.; Petersen, F.F.; Beeson, W.L. Long-Term ambient concentrations of total suspended particulates and oxidants as related to incidence of chronic disease in california seventh-day adventists. *Environ. Health Perspect.* **1991**, *94*, 43–50.
2. Karakatsani, A.; Andreadaki, S.; Katsouyanni, K.; Dimitroulis, I.; Trichopoulos, D.; Benetou, V.; Trichopoulou, A. Air pollution in relation to manifestations of chronic pulmonary disease: A nested case-control study in Athens, Greece. *Eur. J. Epidemiol.* **2003**, *18*, 45–53.
3. Sunyer, J.; Jarvis, D.; Gotschi, T.; Garcia-Esteban, R.; Jacquemin, B.; Aguilera, I.; Ackerman, U.; Marco, R.D.; Forsberg, B.; Gislason, T.; Heinrich, J.; Norbäck, D.; Villani, S.; Künzli, N. Chronic bronchitis and urban air pollution in an international study. *Occup. Environ. Med.* **2006**, *63*, 836–843.
4. Schwartz, J. Particulate air pollution and chronic respiratory disease. *Environ. Res.* **1993**, *62*, 7–13.
5. Xu, X.; Wang, L. Association of indoor and outdoor particulate level with chronic respiratory illness. *Am. Rev. Respir. Dis.* **1993**, *148*, 1516–1522.
6. Zanobetti, A.; Bind, M.-A.C.; Schwartz, J. Particulate air pollution and survival in a COPD cohort. *Environ. Health* **2008**, *7*, doi:10.1186/1476-069X-7-48.
7. Næss, Ø.; Nafstad, P.; Aamodt, G.; Claussen, B.; Rosland, P. Relation between concentration of air pollution and cause-specific mortality: Four-year exposures to nitrogen dioxide and particulate matter pollutants in 470 neighborhoods in Oslo, Norway. *Am. J. Epidemiol.* **2007**, *165*, 435–443.
8. Bateson, T.F.; Schwartz, J. Who is sensitive to the effects of particulate air pollution on mortality? A case-crossover analysis of effect modifiers. *Epidemiology* **2004**, *15*, 143–149.
9. Sunyer, J.; Basagaña, X. Particles, and not gases, are associated with the risk of death in patients with chronic obstructive pulmonary disease. *Int. J. Epidemiol.* **2001**, *30*, 1138–1140.
10. Kan, H.; Chen, B.; Jia, J. A case-crossover study of ambient air pollution and daily mortality in Shanghai. *Zhonghua Liu Xing Bing Xue Za Zhi* **2003**, *24*, 863–867.
11. Braga, A.L.F.; Schwartz, J. The lag structure between particulate air pollution and respiratory and cardiovascular deaths in 10 US cities. *J. Occup. Environ. Med.* **2001**, *43*, 927–933.
12. Schwartz, J.; Dockery, D.W. Increased mortality in Philadelphia associated with daily air pollution concentrations. *Am. Rev. Respir. Dis.* **1992**, *145*, 600–604.
13. Téllez-Rojo, M.M.; Romieu, I.; Ruiz-Velasco, S.; Lezana, M.A.; Hernández-Avila, M.M. Daily respiratory mortality and PM<sub>10</sub> pollution in Mexico City: Importance of considering place of death. *Eur. Respir. J.* **2000**, *16*, 391–396.
14. Fischer, P.; Hoek, G.; Brunekreef, B.; Verhoeff, A.; Wijnenez, J.V., Air pollution and mortality in The Netherlands: Are the elderly more at risk? *Eur. Respir. J.* **2003**, *21*, 34s–38s.
15. Wordley, J.; Walters, S.; Ayres, J.G. Short term variations in hospital admissions and mortality and particulate air pollution. *Occup. Environ. Med.* **1997**, *54*, 108–116.
16. Iwai, K.; Mizuno, S.; Miyasaka, Y.; Mori, T. Correlation between suspended particles in the environmental air and causes of disease among inhabitants: Cross-sectional studies using the vital statistics and air pollution data in Japan. *Environ. Res.* **2005**, *99*, 106–117.

17. Wong, T.W.; Tam, W.S.; Yu, T.S.; Wong, A.H.S. Associations between daily mortalities from respiratory and cardiovascular diseases and air pollution in Hong Kong, China. *Occup. Environ. Med.* **2002**, *59*, 30–35.
18. Wong, C.M.; Yang, L.; Thach, T.Q.; Chau, P.Y.K.; Chan, K.P.; Thomas, G.N.; Lam, T.H.; Wong, T.W.; Hedley, A.J.; Peiris, J.S.M. Modification by influenza on health effects of air pollution in Hong Kong. *Environ. Health Perspect.* **2009**, *117*, 248–253.
19. Xu, Z.; Yu, D.; Jing, L.; Xu, X. Air pollution and daily mortality in Shenyang, China. *Arch. Environ. Health* **2000**, *55*, 115–120.
20. Janssen, N.A.H.; Schwartz, J.; Zanobetti, A.; Suh, H.H. Air conditioning and source-specific particles as modifiers of the effect of PM<sub>10</sub> on hospital admissions for heart and lung disease. *Environ. Health Perspect.* **2002**, *110*, 43–49.
21. Dominici, F.; Peng, R.D.; Bell, M.L.; Pham, L.; McDermott, A.; Zeger, S.L.; Samet, J.M. Fine particulate air pollution and hospital admission for cardiovascular and respiratory diseases. *JAMA* **2006**, *295*, 1127–1134.
22. Moolgavkar, S.H. Air pollution and hospital admissions for chronic obstructive pulmonary disease in three metropolitan areas in the United States. *Inhal. Toxicol.* **2000**, *12*, 75–90.
23. Chen, L.; Yang, W.; Jennison, B.L.; Omaye, S.T. Air particulate pollution and hospital admissions for chronic obstructive pulmonary disease in Reno, Nevada. *Inhal. Toxicol.* **2000**, *12*, 281–298.
24. Schwartz, J. Air pollution and hospital admissions for the elderly in Birmingham, Alabama. *Am. J. Epidemiol.* **1994**, *139*, 589–598.
25. Schwartz, J. PM<sub>10</sub>, ozone, and hospital admissions for the elderly in Minneapolis-St. Paul, Minnesota. *Arch. Environ. Health* **1994**, *49*, 366–374.
26. Peel, J.L.; Tolbert, P.E.; Klein, M.; Metzger, K.B.; Flanders, W.D.; Todd, K.; Mulholland, J.A.; Ryan, P.B.; Frumkin, H. Ambient air pollution and respiratory emergency department visits. *Epidemiology* **2005**, *16*, 164–174.
27. Schwartz, J. Air pollution and hospital admissions for the elderly in Detroit, Michigan. *Am. J. Respir. Crit. Care Med.* **1994**, *150*, 648–655.
28. Lippmann, M.; Ito, K.; Nádas, A.; Burnett, R.T. Association of particulate matter components with daily mortality and morbidity in urban populations. *Res. Rep. Health Effect Inst.* **2000**, *95*, 5–72.
29. Yang, Q.Y.; Chen, Y.; Krewski, D.; Burnett, R.T.; Shi, Y.L.; McGrail, K.M. Effect of short-term exposure to low levels of gaseous pollutants on chronic obstructive pulmonary disease hospitalizations. *Environ. Res.* **2005**, *99*, 99–105.
30. Sunyer, J.; Sáez, M.; Murillo, C.; Castellsague, J.; Martínez, F.; Antó, J.M. Air pollution and emergency room admissions for chronic obstructive pulmonary disease: A 5-year study. *Am. J. Epidemiol.* **1993**, *137*, 701–705.
31. Dab, W.; Medina, S.; Quénel, P.; Moullec, Y.L.; Tertre, A.L.; Thelot, B.; Monteil, C.; Lameloise, P.; Pirard, P.; Momas, I.; Ferry, R.; Festy, B. Short term respiratory health effects of ambient air pollution: Results of the APHEA project in Paris. *J. Epidemiol. Community Health* **1996**, *50*, 42s–46s.
32. Fusco, D.; Forastiere, F.; Michelozzi, P.; Spadea, T.; Ostro, B.; Arcà, M.; Perucci, C.A. Air pollution and hospital admissions for respiratory conditions in Rome, Italy. *Eur. Respir. J.* **2001**, *17*, 1143–1150.

33. Leitte, A.M.; Petrescu, C.; Franck, U.; Richter, M.; Suciu, O.; Ionovici, R.; Herbarth, O.; Schlink, U. Respiratory health, effects of ambient air pollution and its modification by air humidity in Drobeta-Turnu Severin, Romania. *Sci. Total Environ.* **2009**, *407*, 4004–4011.
34. Milutinović, S.; Nikić, D.; Stosić, L.; Stanković, A.; Bogdanović, D. Short-term association between air pollution and emergency room admissions for chronic obstructive pulmonary disease in Nis, Serbia. *Cent. Eur. J. Public Health* **2009**, *17*, 8–13.
35. Wong, T.W.; Lau, T.S.; Yu, T.S.; Neller, A.; Wong, S.L.; Tam, W.; Pang, S.W. Air pollution and hospital admissions for respiratory and cardiovascular diseases in Hong Kong. *Occup. Environ. Med.* **1999**, *56*, 679–683.
36. Ko, F.W.S.; Tam, W.; Wong, T.W.; Chan, D.P.S.; Tung, A.H.; Lai, C.K.W.; Hui, D.S.C. Temporal relationship between air pollutants and hospital admissions for chronic obstructive pulmonary disease in Hong Kong. *Thorax* **2007**, *62*, 780–785.
37. Morgan, G.; Corbett, S.; Wlodarczyk, J. Air pollution and hospital admissions in Sydney, Australia, 1990 to 1994. *Am. J. Public Health* **1998**, *88*, 1761–1766.
38. Pande, J.N.; Bhatta, N.; Biswas, D.; Pandey, R.M.; Ahluwalia, G.; Siddaramaiah, N.H.; Khilnani, G.C. Outdoor air pollution and emergency room visits at a hospital in Delhi. *Indian J. Chest Dis. Allied Sci.* **2002**, *44*, 13–19.
39. Cirera, L.; Garcia-Marcos, L.; Gimenez, J.; Moreno-Grau, S.; Tobias, A.; Perez-Fernandez, V.; Elvira-Rendeles, B.; Guillen, J.J.; Navarro, C. Daily effects of air pollutants and pollen types on asthma and COPD hospital emergency visits in the industrial and Mediterranean Spanish city of Cartagena. *Aller. Immunopathol. (Madr.)* **2011**, *40*, 231–237.
40. Arbex, M.A.; de Souza Conceicao, G.M.; Cendon, S.P.; Arbex, F.F.; Lopes, A.C.; Moyses, E.P.; Santiago, S.L.; Saldiva, P.H.; Pereira, L.A.; Braga, A.L. Urban air pollution and chronic obstructive pulmonary disease-related emergency department visits. *J. Epidemiol. Community Health* **2009**, *63*, 777–783.
41. Sauerzapf, V.; Jones, A.P.; Cross, J. Environmental factors and hospitalisation for chronic obstructive pulmonary disease in a rural county of England. *J. Epidemiol. Community Health* **2009**, *63*, 324–328.
42. Yang, C.Y.; Chen, C.J. Air pollution and hospital admissions for chronic obstructive pulmonary disease in a subtropical city: Taipei, Taiwan. *J. Toxicol. Environ. Health* **2007**, *70*, 1214–1219.
43. Lee, I.M.; Tsai, S.S.; Chang, C.C.; Ho, C.K.; Yang, C.-Y. Air pollution and hospital admissions for chronic obstructive pulmonary disease in a tropical city: Kaohsiung, Taiwan. *Inhal. Toxicol.* **2007**, *19*, 393–398.
44. Medina-Ramón, M.; Zanobetti, A.; Schwartz, J. The effect of ozone and PM<sub>10</sub> on hospital admissions for pneumonia and chronic obstructive pulmonary disease: A national multicity study. *Am. J. Epidemiol.* **2006**, *163*, 579–588.
